# Supplementary material
Source: MDPI journal article supplement (https://www.mdpi.com/2311-5629/5/3/37)
Supplement: s1 [file s1]

## Supporting Information

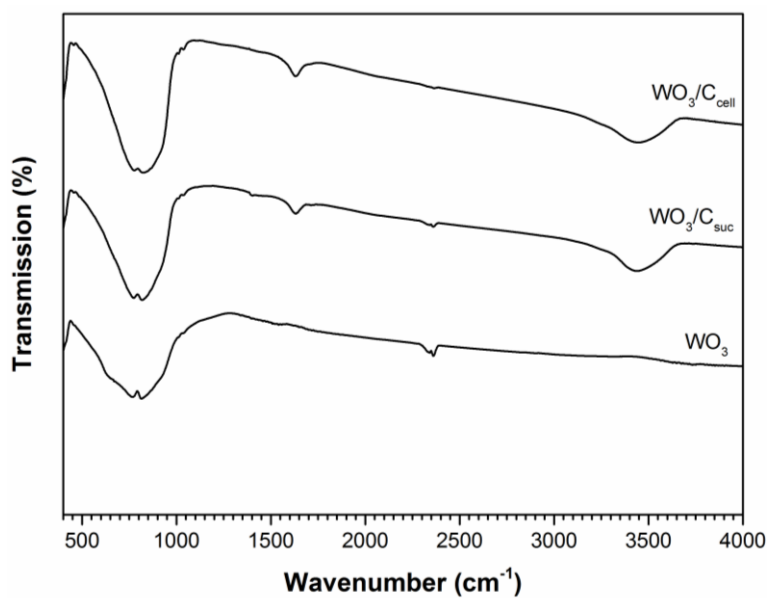

**Figure 1.** FTIR spectra of the different  $\text{WO}_3/\text{C}$  composites. The pristine  $\text{WO}_3$  material is also reported.

About the FTIR characterization, the spectra of the  $\text{WO}_3/\text{C}$  composites are similar and no vibration bands corresponding to secondary phases or impurities is detected compared to the spectrum of the pure  $\text{WO}_3$  phase (Figure - down).

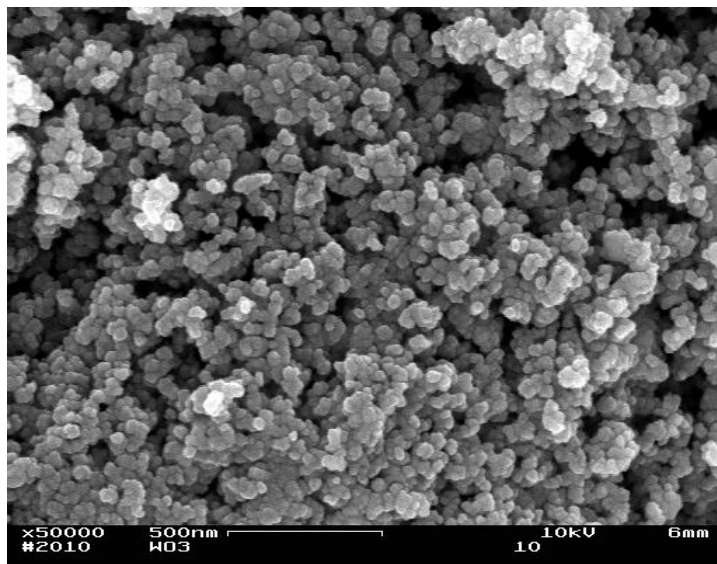

**Figure 2.** SEM view of the pristine  $\text{WO}_3$  material.
